# Supplementary material
Source: Springer Nature journal article supplement (https://www.springermedizin.de/resource/supplementary/13041_2008_27_MOESM5_ESM.pdf/25657440)

**A** NP40 extracts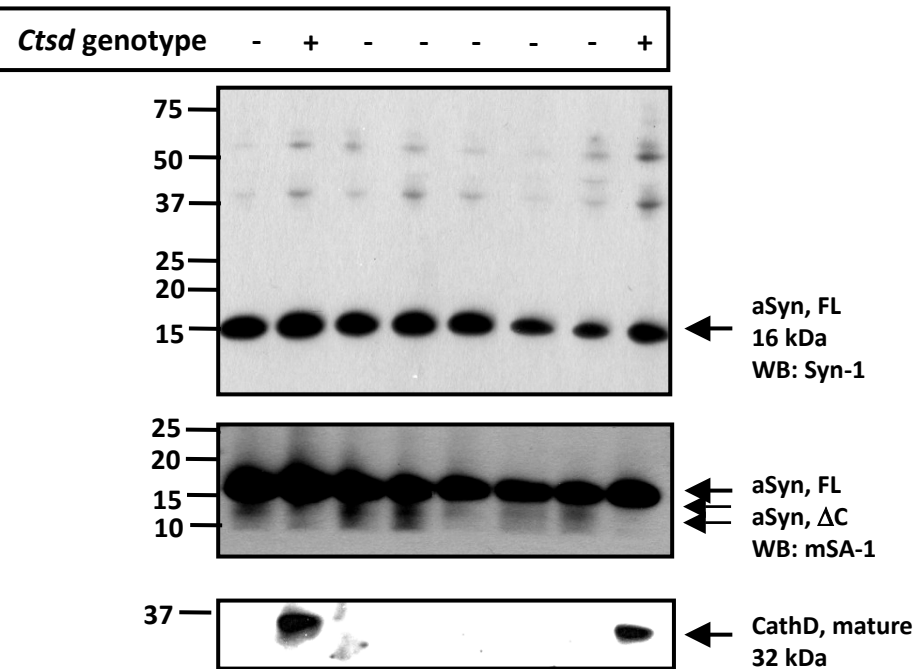**B** SDS extracts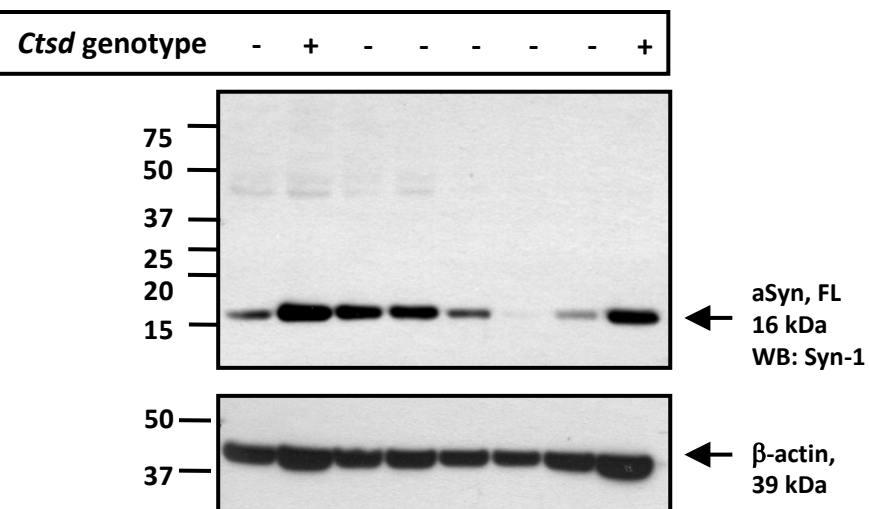**C**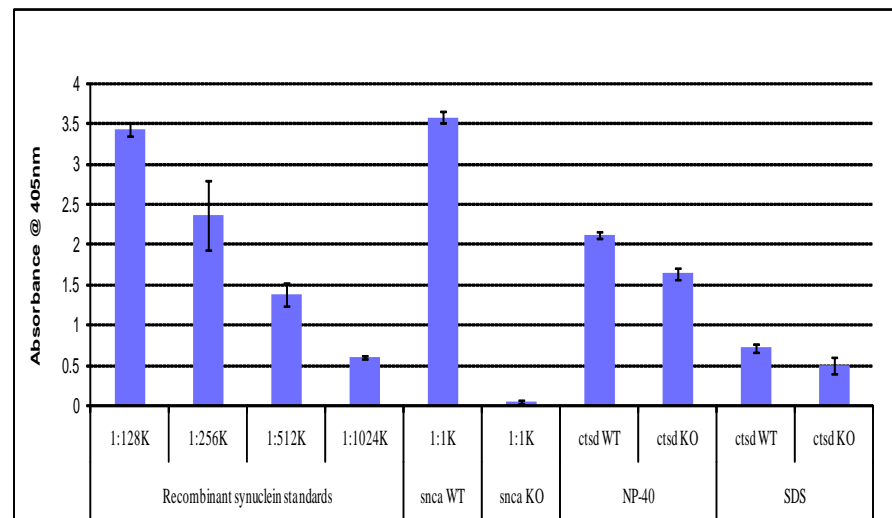

Supplement: MOESM5 [file 25657440]
